# Supplementary material for: Strain analysis of black-to-yellow phase transitions in CsPbI3
Source: Research Square preprint supplement (doi:10.21203/rs.3.rs-5947683/v1), 2025-03-03
Supplement: Supplementary file 1 [file 26cf057f1c4936af57be6df0.docx]

Supplementary Information for:

**Strain analysis of black-to-yellow phase transitions in CsPbI3**

Bangwei Jin1; Ruihao Gong2; Dongchen Lan2; Dexin Yang1*; Xuefeng Zhang1*

1. Institute of Advanced Magnetic Materials, College of Materials & Environmental Engineering, Hangzhou Dianzi University, Hangzhou 310018, China;
2. College of Electrical Engineering, Zhejiang University, Hangzhou 310027, China.

*Corresponding authors: Xuefeng Zhang (zhang@hdu.edu.cn); Dexin Yang ([dy263@hdu.edu.cn](mailto:dy263@hdu.edu.cn)).


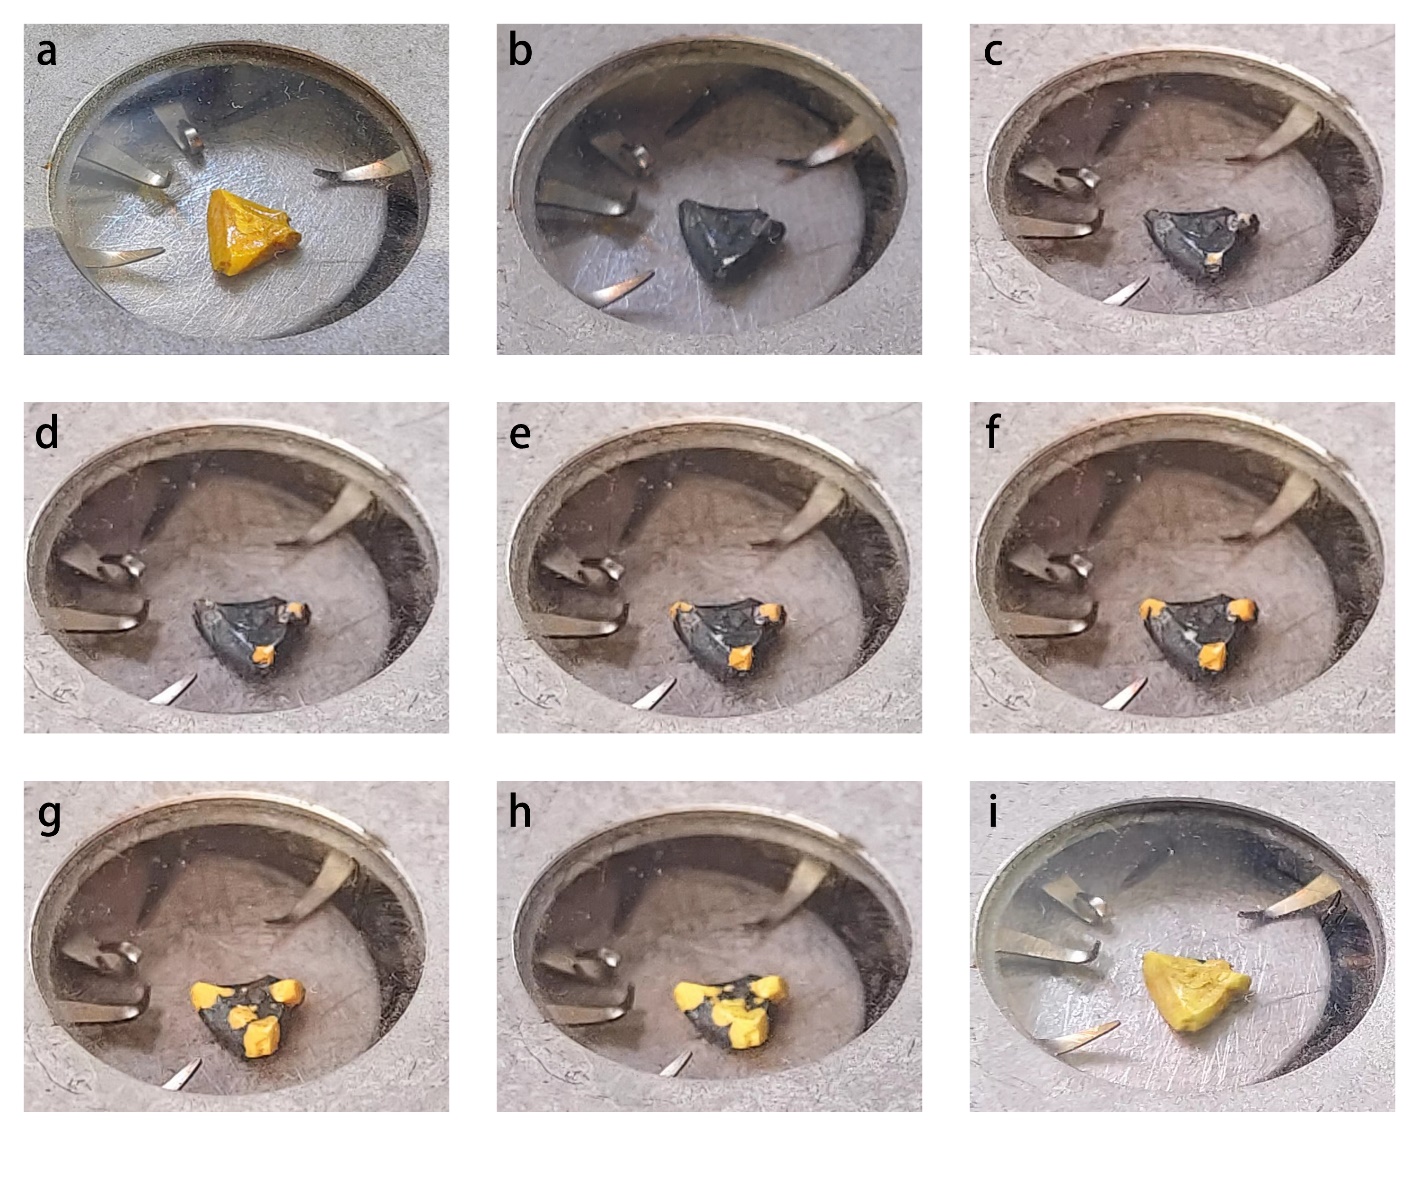


**Supplementary Figure 1 | Photos of a prepared CsPbI3 bulk crystal at different temperatures.** **a**, A yellow δ-CsPbI3 crystal at room temperature. **b**,A black CsPbI3 crystal at 610 K heating from (**a**). **c-i**, The black CsPbI3 crystal from (**b**) rapidly transformed to the yellow phase as it cooled naturally in air at 30 s (**c**), 40 s (**d**), 50 s (**e**), 60 s (**f**), 2 min (**g**), 5 min (**h**) and 10 min (**i**).


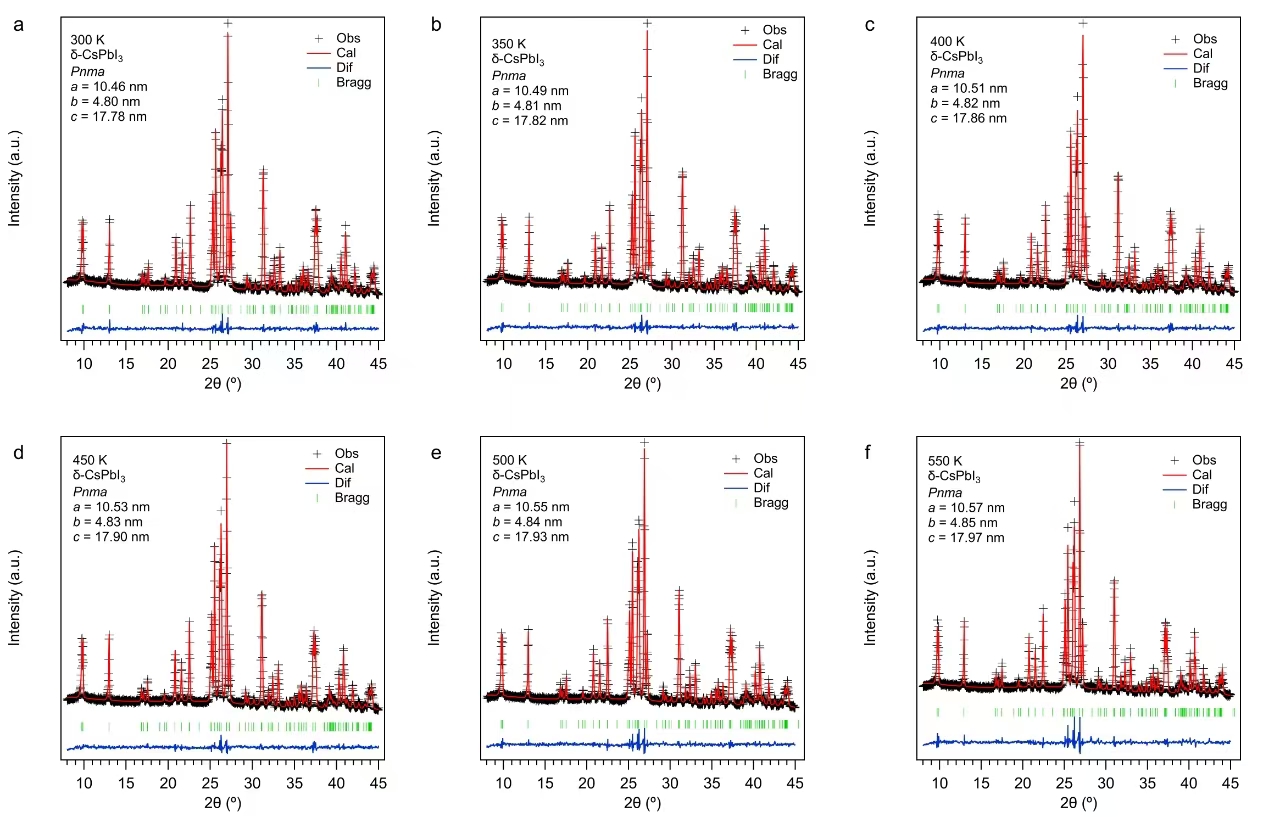


**Supplementary Figure 2 | Rietveld refinement results of XRD patterns of δ-CsPbI3 measured between 300 K and 550 K during heating.****a**, 300 K; **b**, 350 K; **c**, 400 K; **d**, 450 K; **e**, 500 K; and **f**, 550 K. The observed profile is marked by black crosses, while the calculated profile is represented by a red line. Bragg peak positions of δ-CsPbI3 crystals are labeled by green marks. The difference diffractogram (experimental minus calculated profile) is shown in light blue.


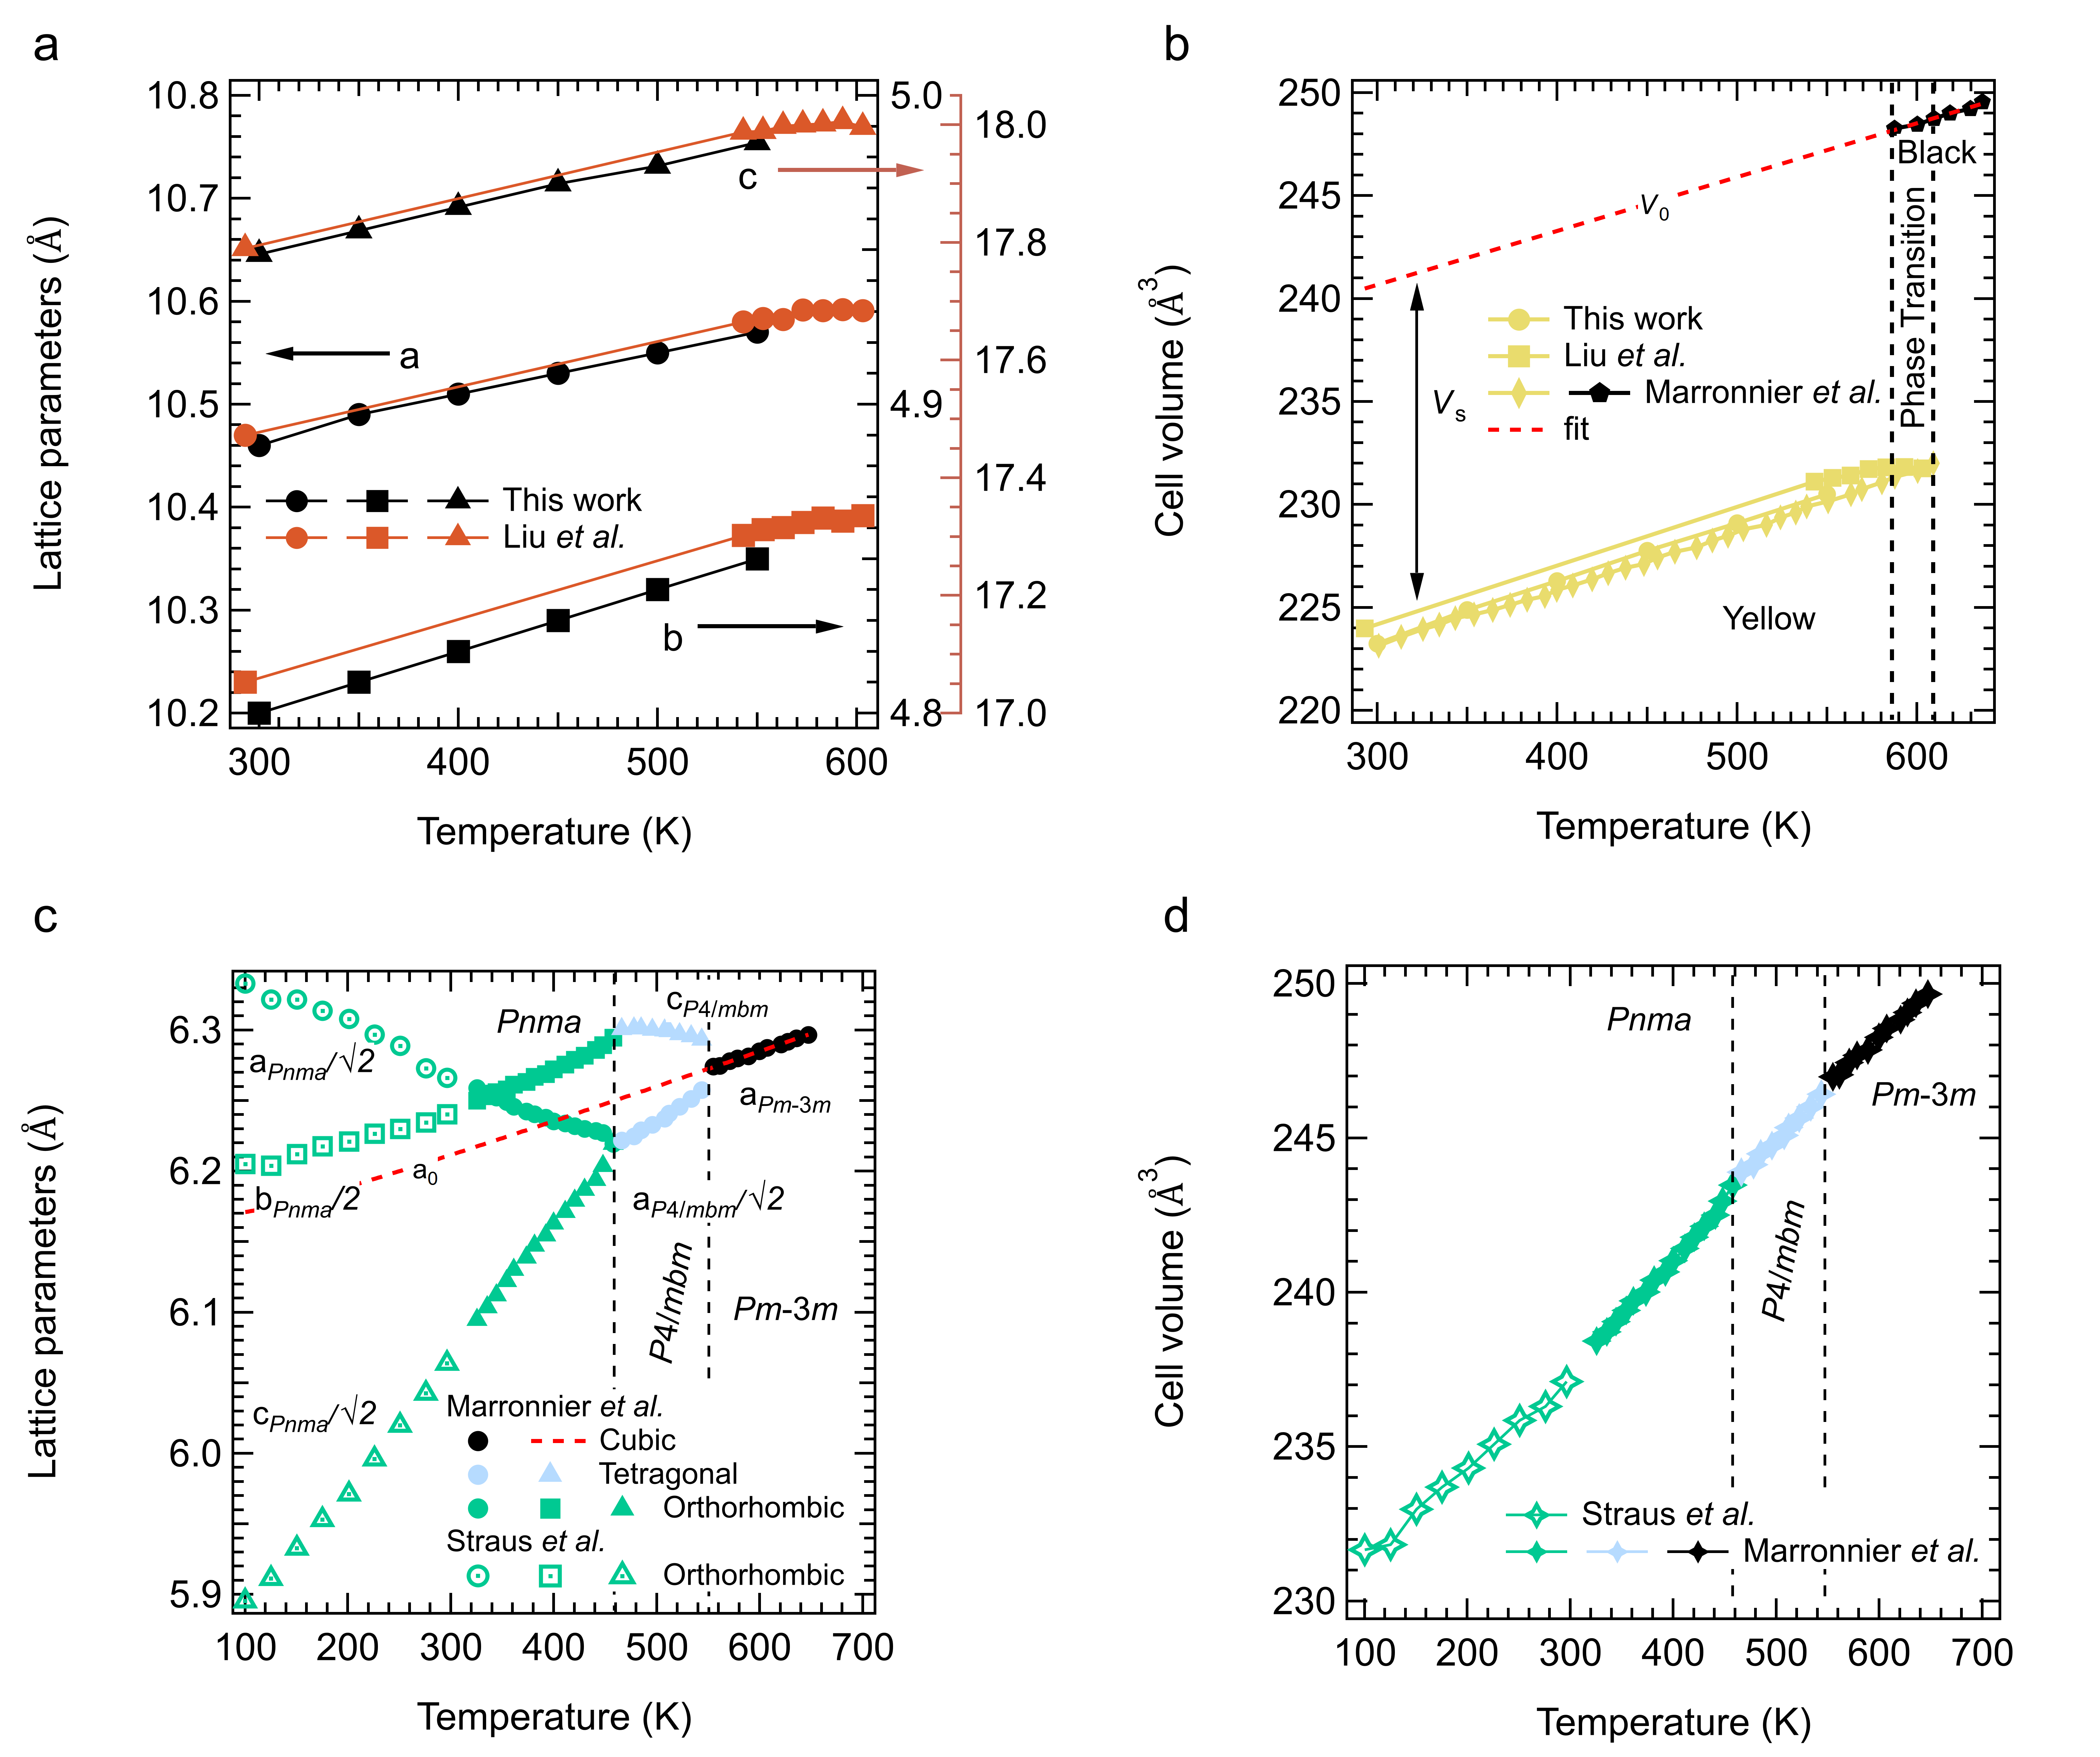


**Supplementary Figure 3 | Lattice parameters and cell volume for both black and yellow CsPbI3 crystals between 100 K and 650 K, demonstrating the yellow δ-CsPbI3 to black α-CsPbI3 transition during heating, and *Pmm* (α) ↔*P*4/*mbm* (β) ↔*Pnma* (γ) transition of black CsPbI3 during cooling. a**, Lattice parameters for yellow δ-CsPbI3 as a function of temperature, including data from this study and Liu *et al*.[1](#_ENREF_1" \o "Liu, 2019 #26) The black and red axes on the right side represent the lattice parameters of *b* and *c*, respectively, while the left axis represents the lattice parameter *a*. **b**, Cell volume variations compiled from this study, Liu *et al*.[1](#_ENREF_1), and Marronnier *et al*.[2](#_ENREF_2) The yellow δ-CsPbI3 (*Pnma*) to black α-CsPbI3 (*Pmm*) phase transition occurs at ~600 K, consistent with the DSC results in Figure 1a, showing a significant increase in cell volume during heating. The reference parameter *V*0 was determined by extrapolating a linear fit to the cubic lattice parameters at high temperatures. **c**, Lattice parameters from Marronnier *et al*.[2](#_ENREF_2) and Straus *et al*.[3](#_ENREF_3) during cooling. Curved dotted lines represent variations of *a*o, obtained from fits of Eq. (2) to the lattice parameter of the parent cubic structure, with Θs fixed at 150 K. **d**, Variations of the unit cell volumes of black CsPbI3 during cooling.

**
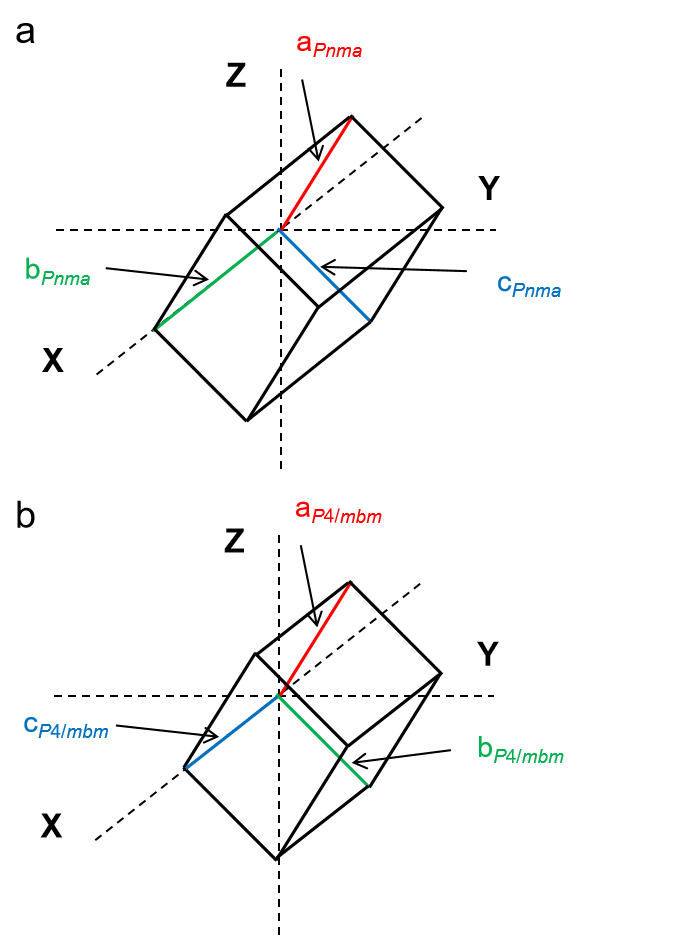
**

**Supplementary Figure 4 | Crystallographic axes for the *Pnma* and *P*4/*mbm* space groups.** Relationships between crystallographic axes and reference axes, for definition of strains used in Eq. (1), for the space groups *Pnma* (0*q*20 *q*40*q*6) (**a**) and *P*4/*mbm* (0*q*20 000) (**b**) (after Carpenter 2007 Am Min 92 309)[4](#_ENREF_4).


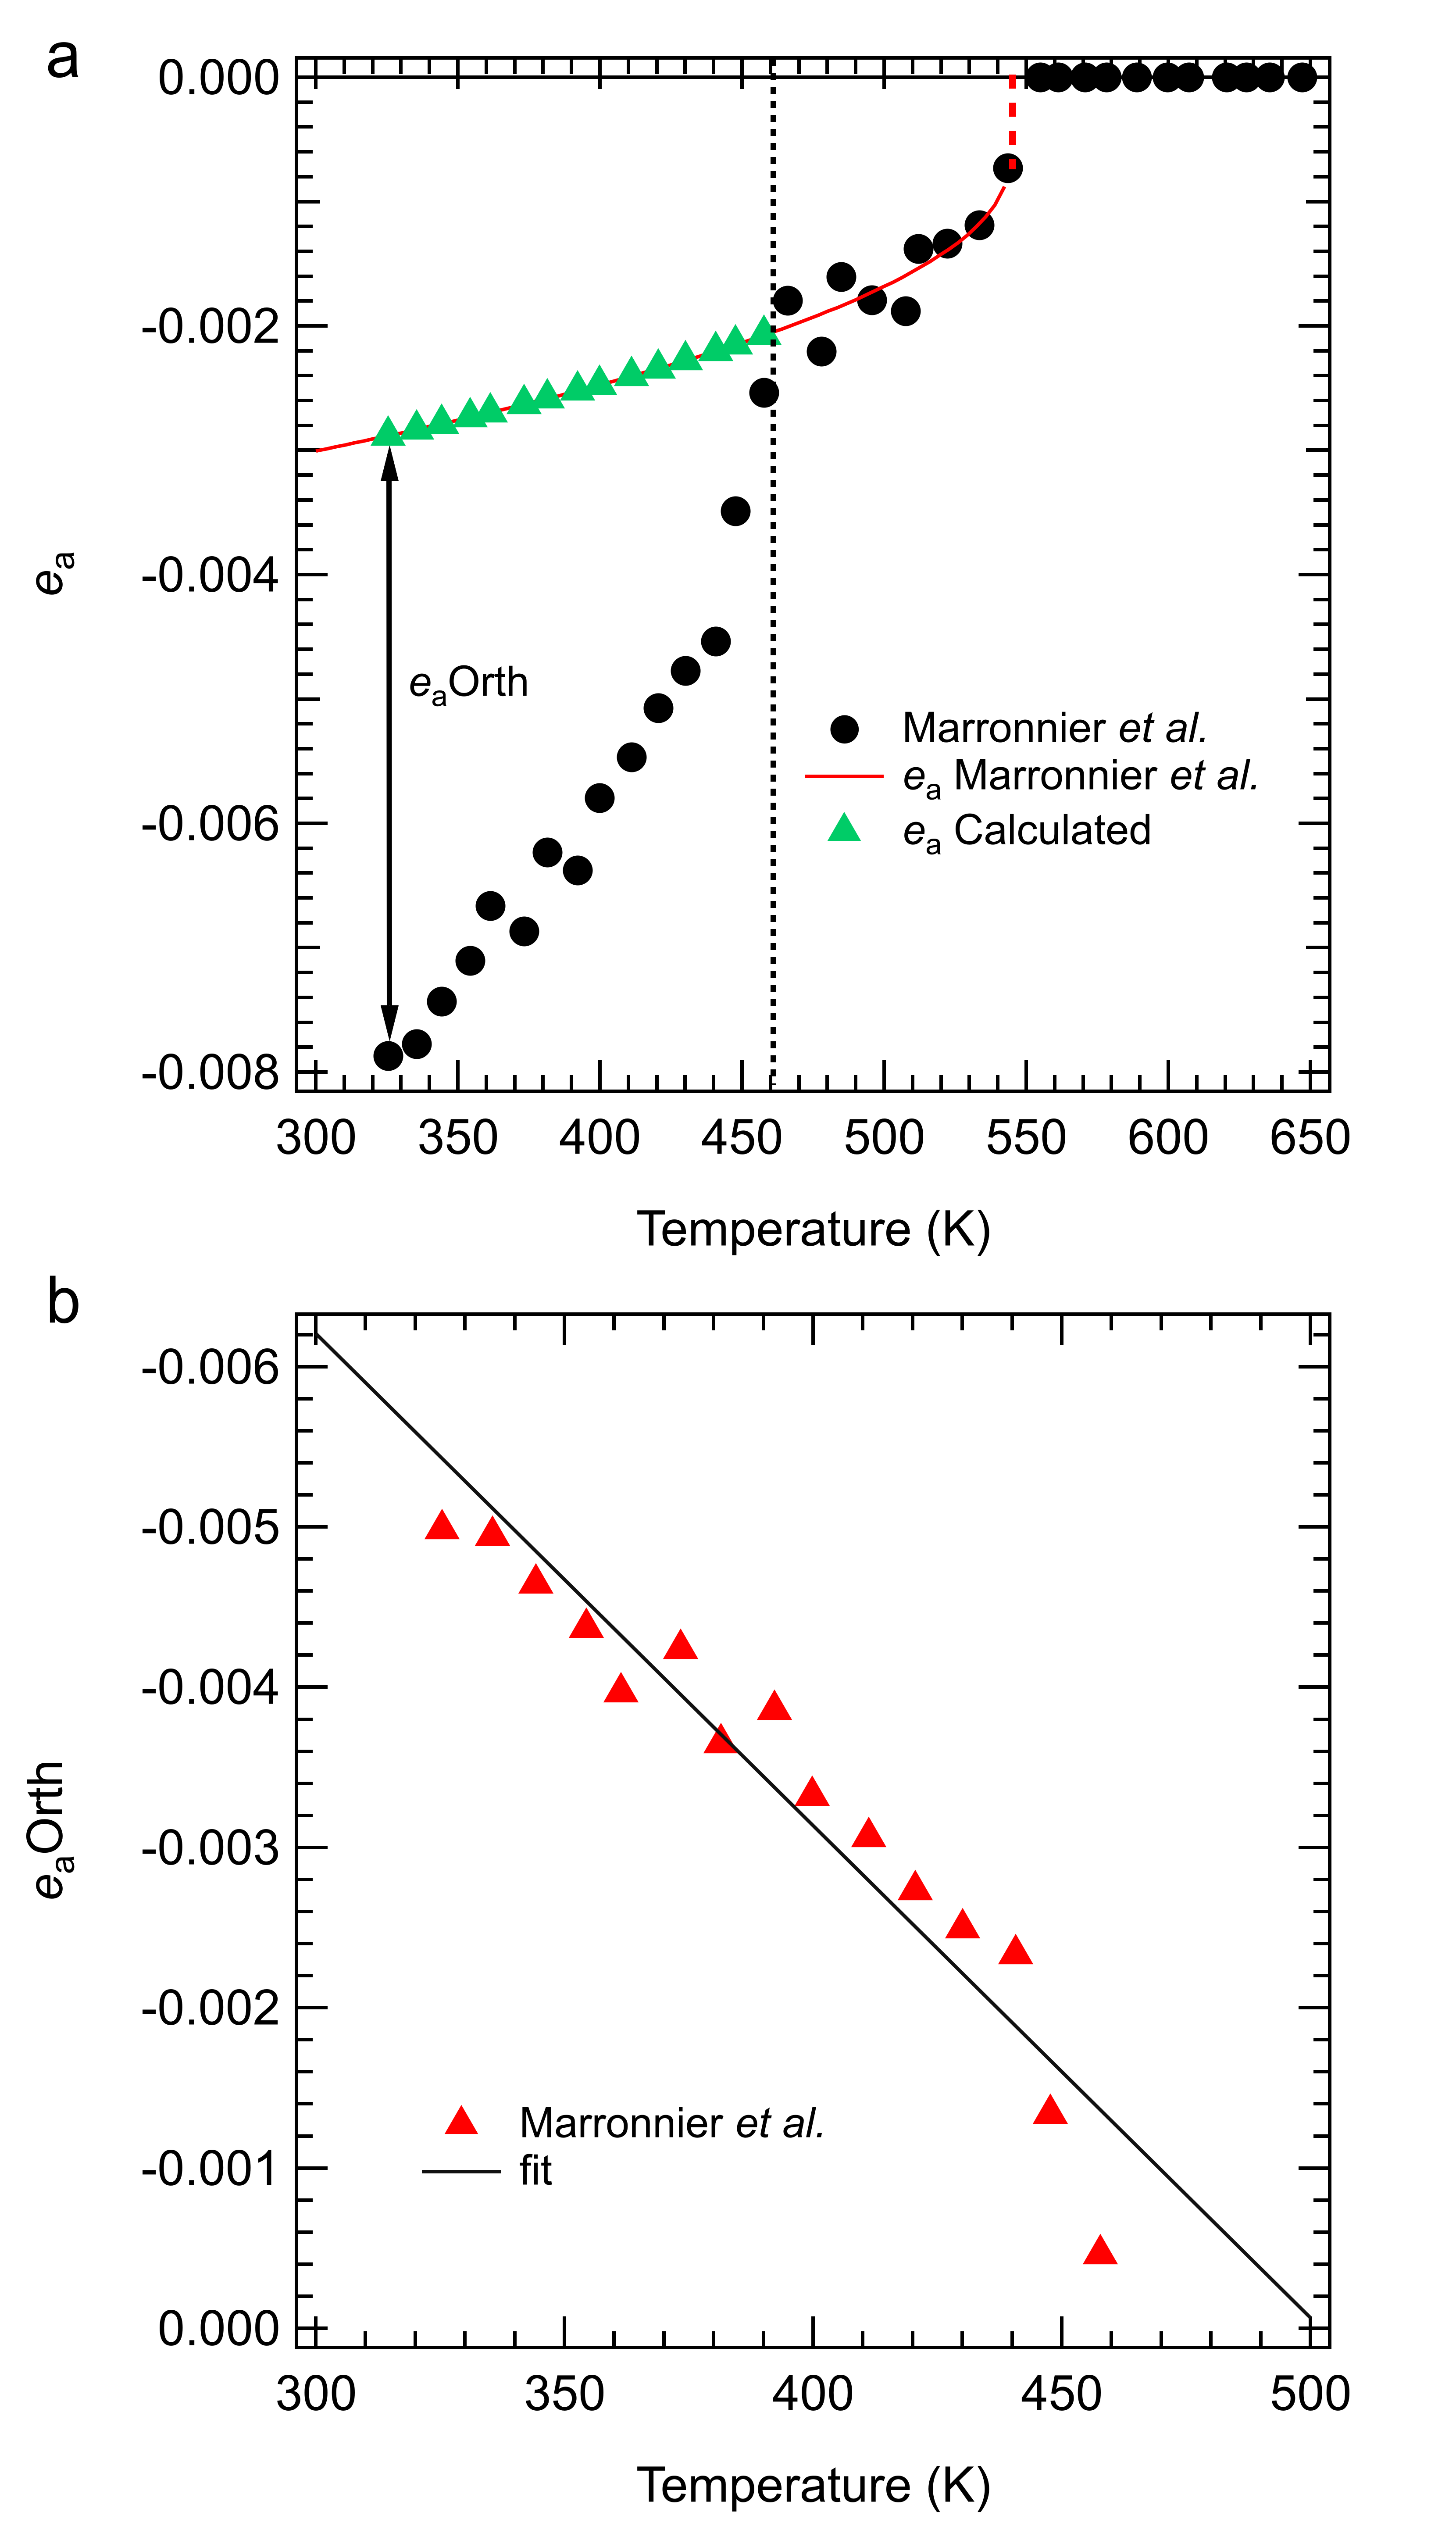


**Supplementary Figure 5 | Volume strains calculated from the lattice parameters of Marronnier *et al*.**[**2**](#_ENREF_2) **of a black CsPbI3 perovskite. a**, Variations of volume strain, *e*a. The curve through data in the temperature interval 465-544 K is a fit of Eq. (4) for a first order transition, assuming *e*atet ∝ *Q*2. Extrapolation of this fit to lower temperature provides a baseline which allows the volume strain associated with the *P*4/*mbm* → *Pnma* transition, *e*aorth, to be estimated. **b**, The variation of *e*aorth, from (**a**) is linear within experimental error, signifying that the *P*4/*mbm* → *Pnma* transition can be represented approximately as a second order transition in one order parameter with *e*aorth ∝ *Q*2. However, extrapolation of the fit to zero gives *T*c = 500 K, which is above the actual transition temperature 456 K.


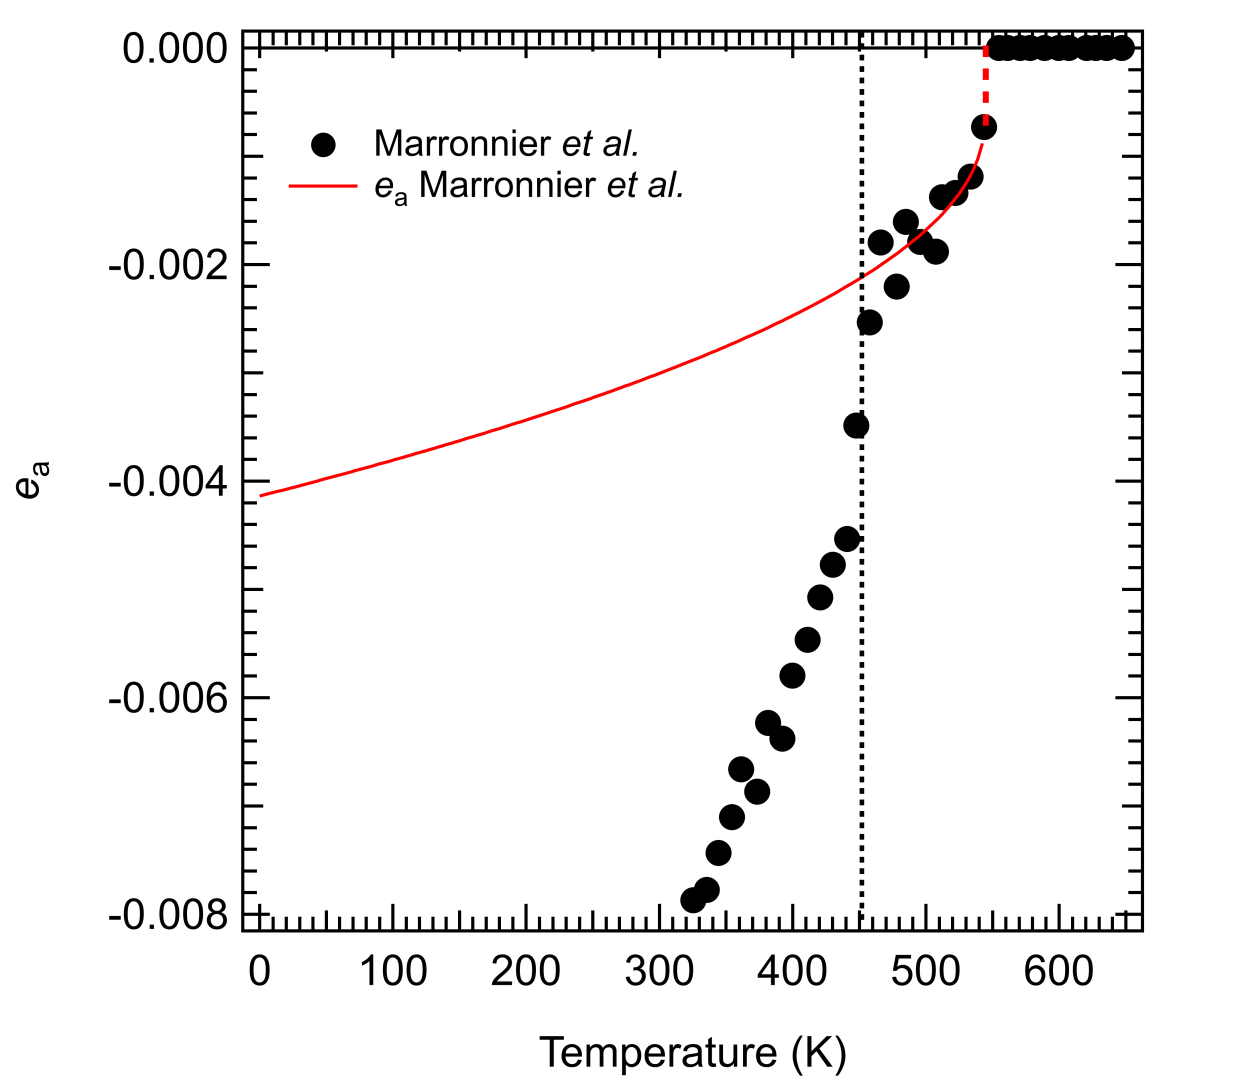


**Supplementary Figure 6 | Variations of volume strain, *e*a, above room temperature from Marronnier *et al*.**[**2**](#_ENREF_2) **of a black CsPbI3 perovskite.** The curve through data in the temperature interval 465-544 K is a fit of Eq. (4) for a first order transition, assuming *e*atet ∝ *Q*2. Extrapolation of this fit to 0 K gives the value of *e*a for the tetragonal phase, *e*atet, as -0.0042 at 0 K, where *Q* = 1.


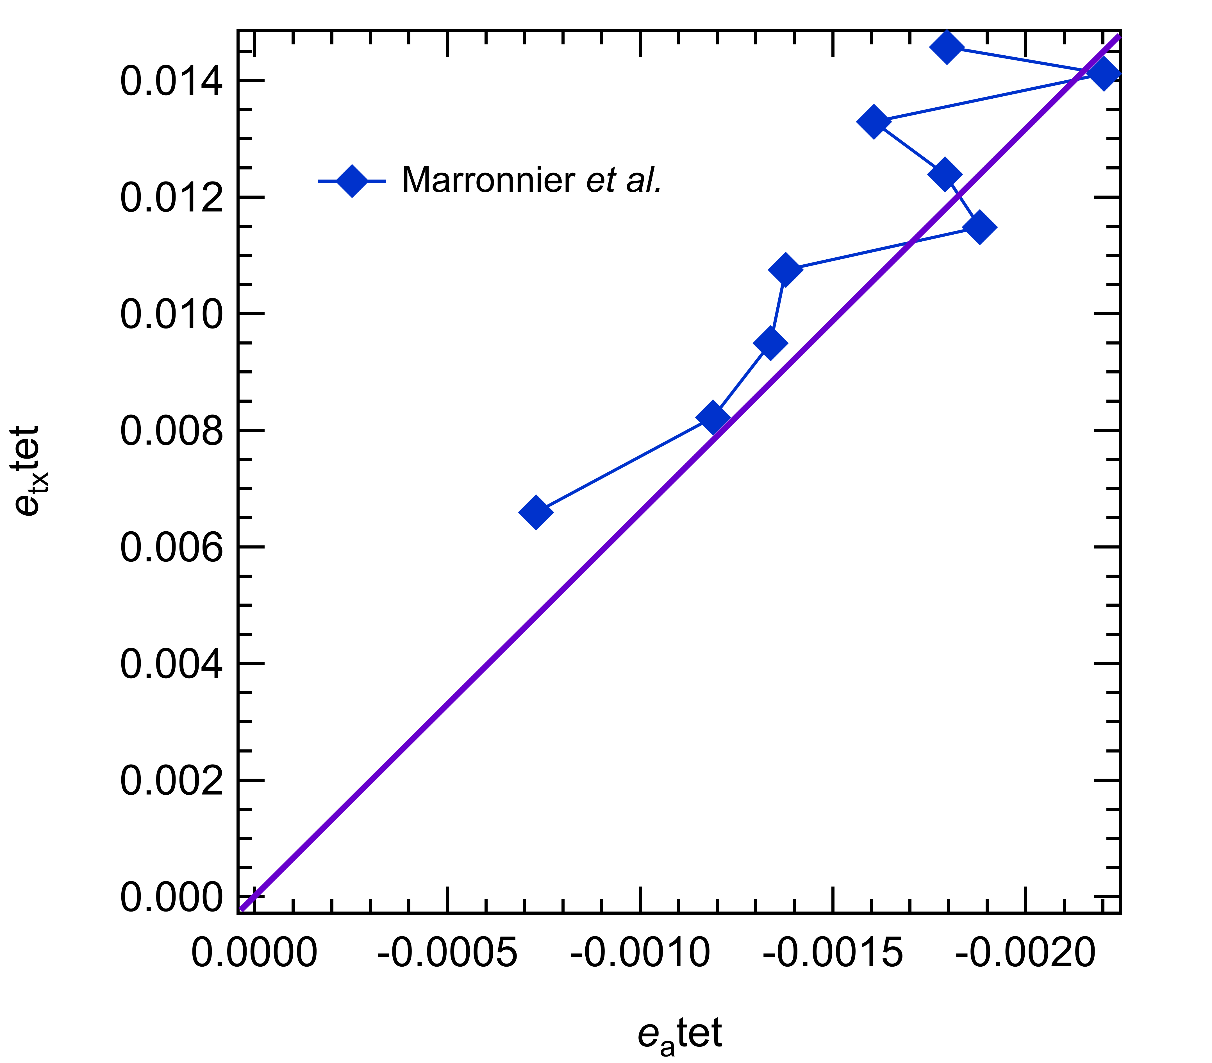


**Supplementary Figure 7 | Relationship of *e*txtet and *e*atet in the tetragonal structure of a black CsPbI3 perovskite.** *e*txtet does not scale linearly with *e*atet in the temperature interval 544-466 K as expected from the relationship *e*tx ∝ *e*atet ∝ *Q*2 in Supplementary Table 2.

**
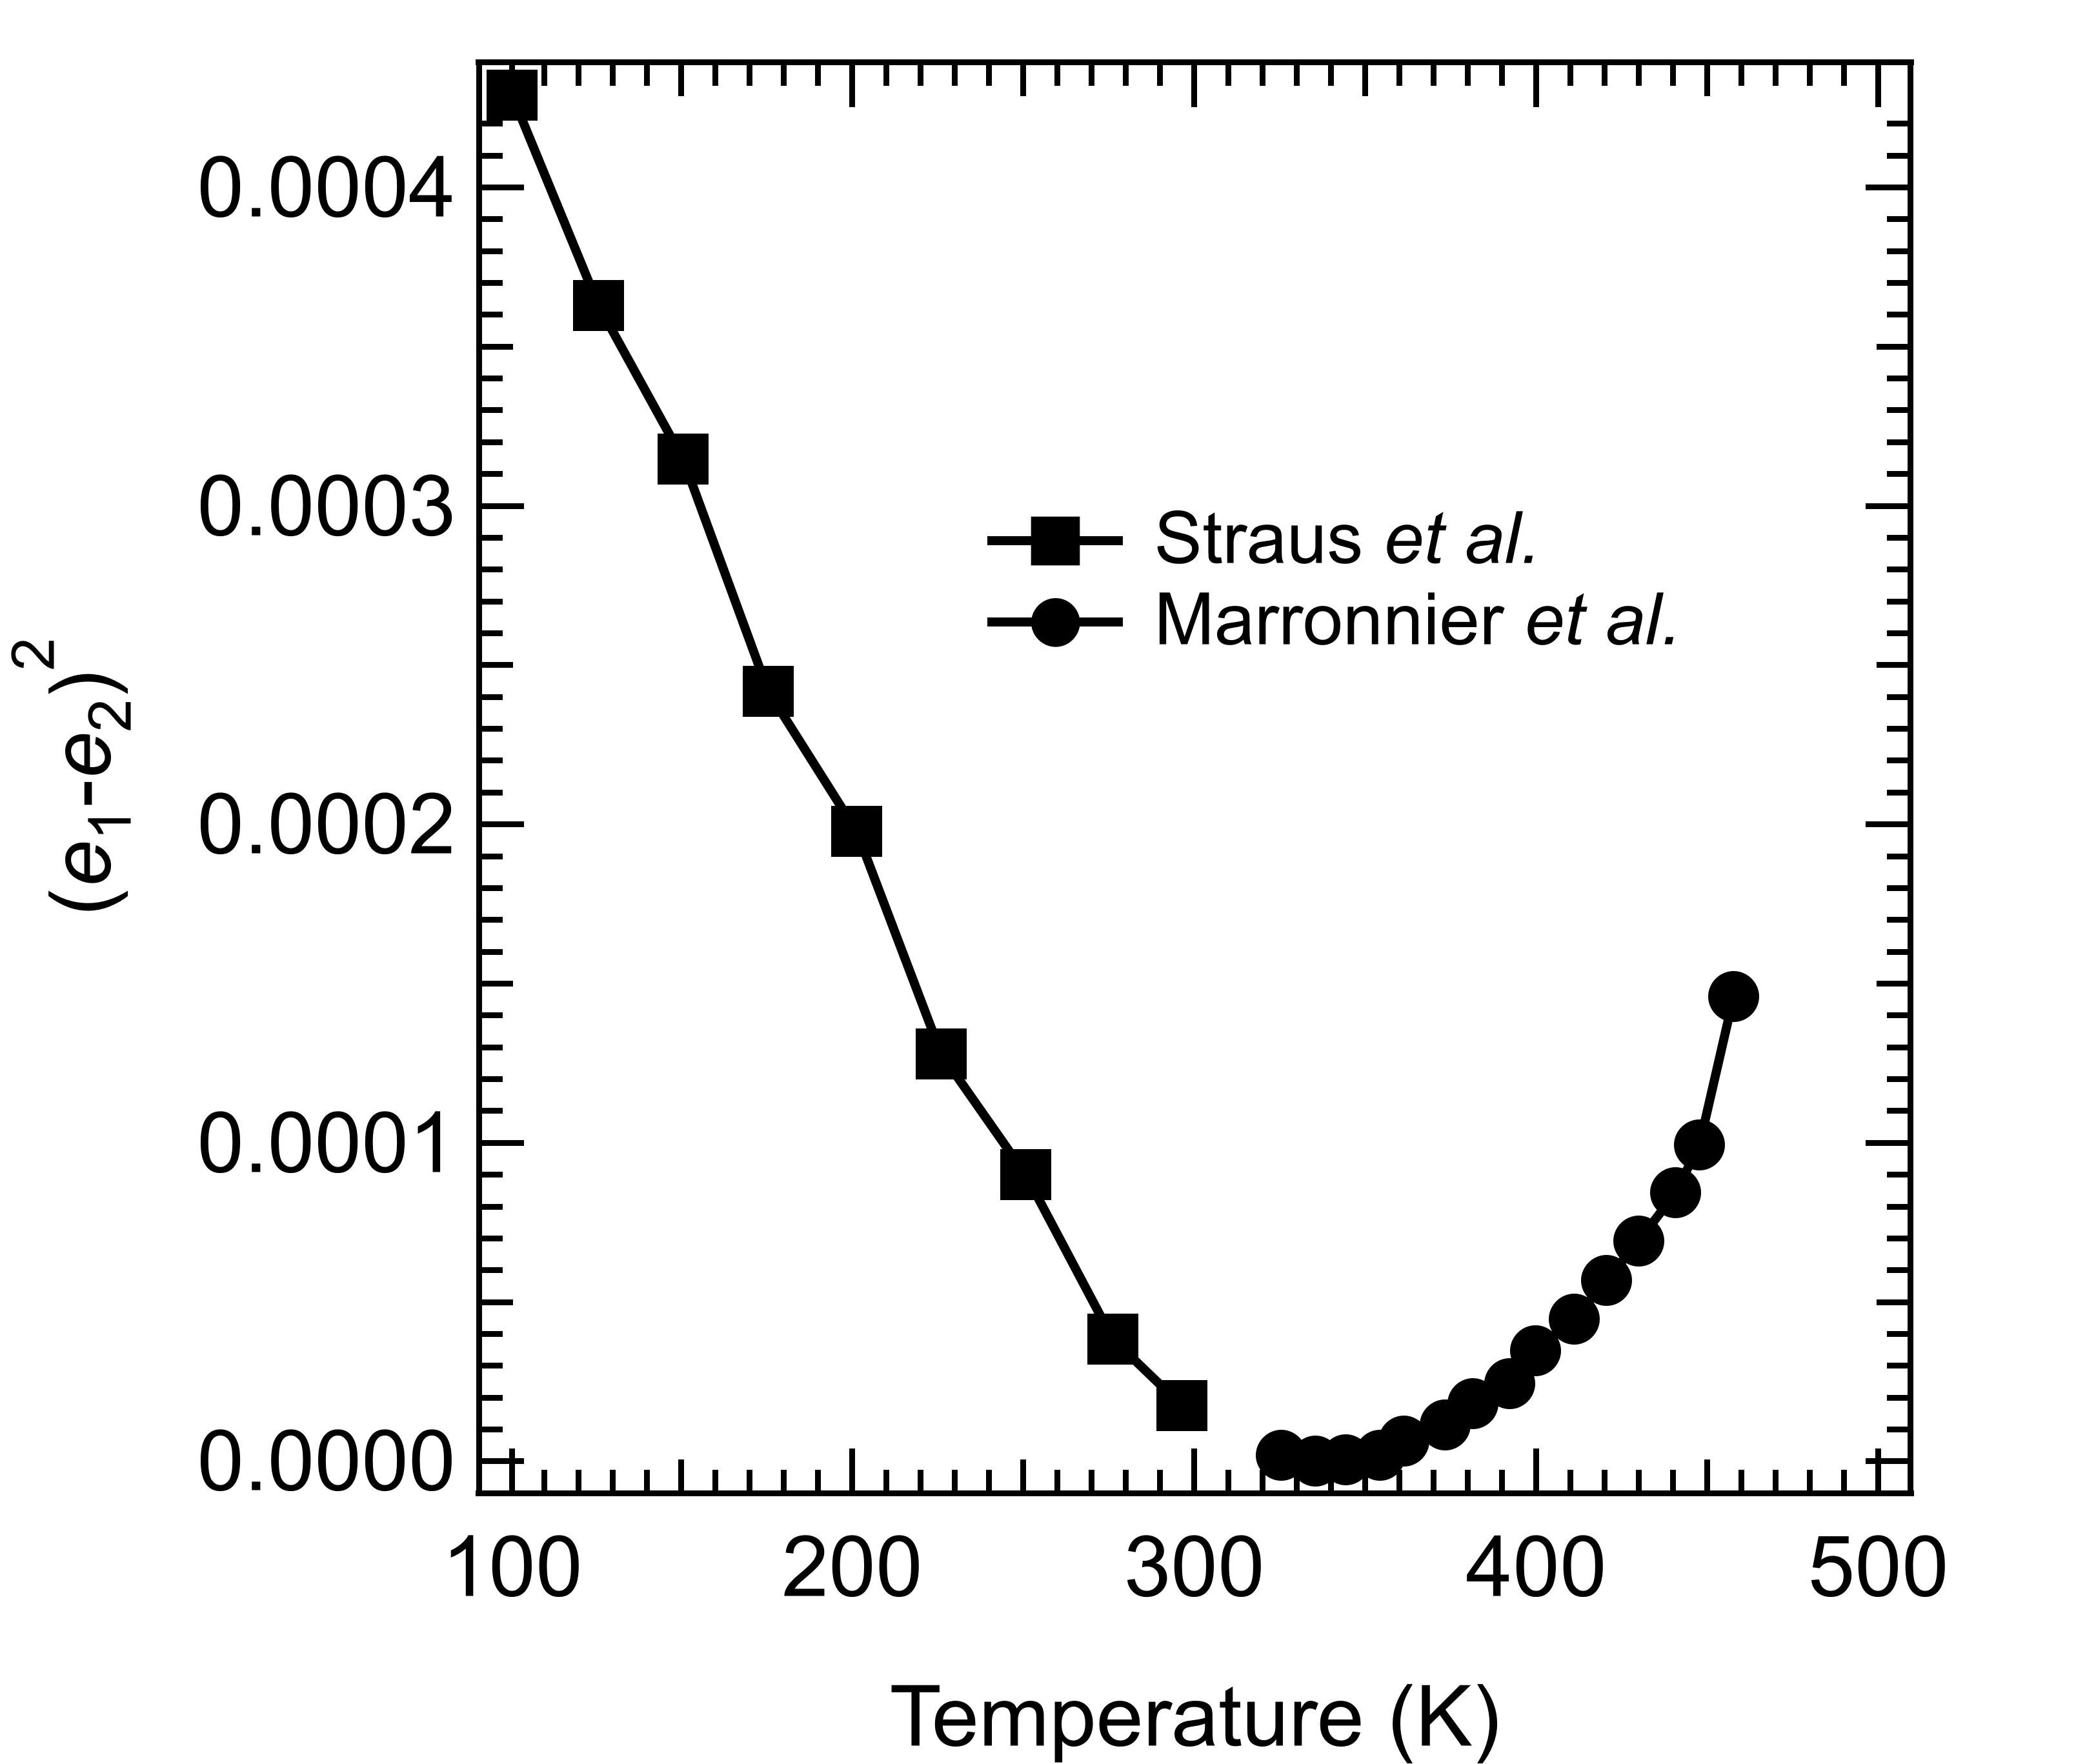
**

**Supplementary Figure 8 | (*e*1-*e*2)2 of black γ-CsPbI3.** An alternative representation of the same result shows (*e*1-*e*2)2 has a rounded minimum at ~325 K.


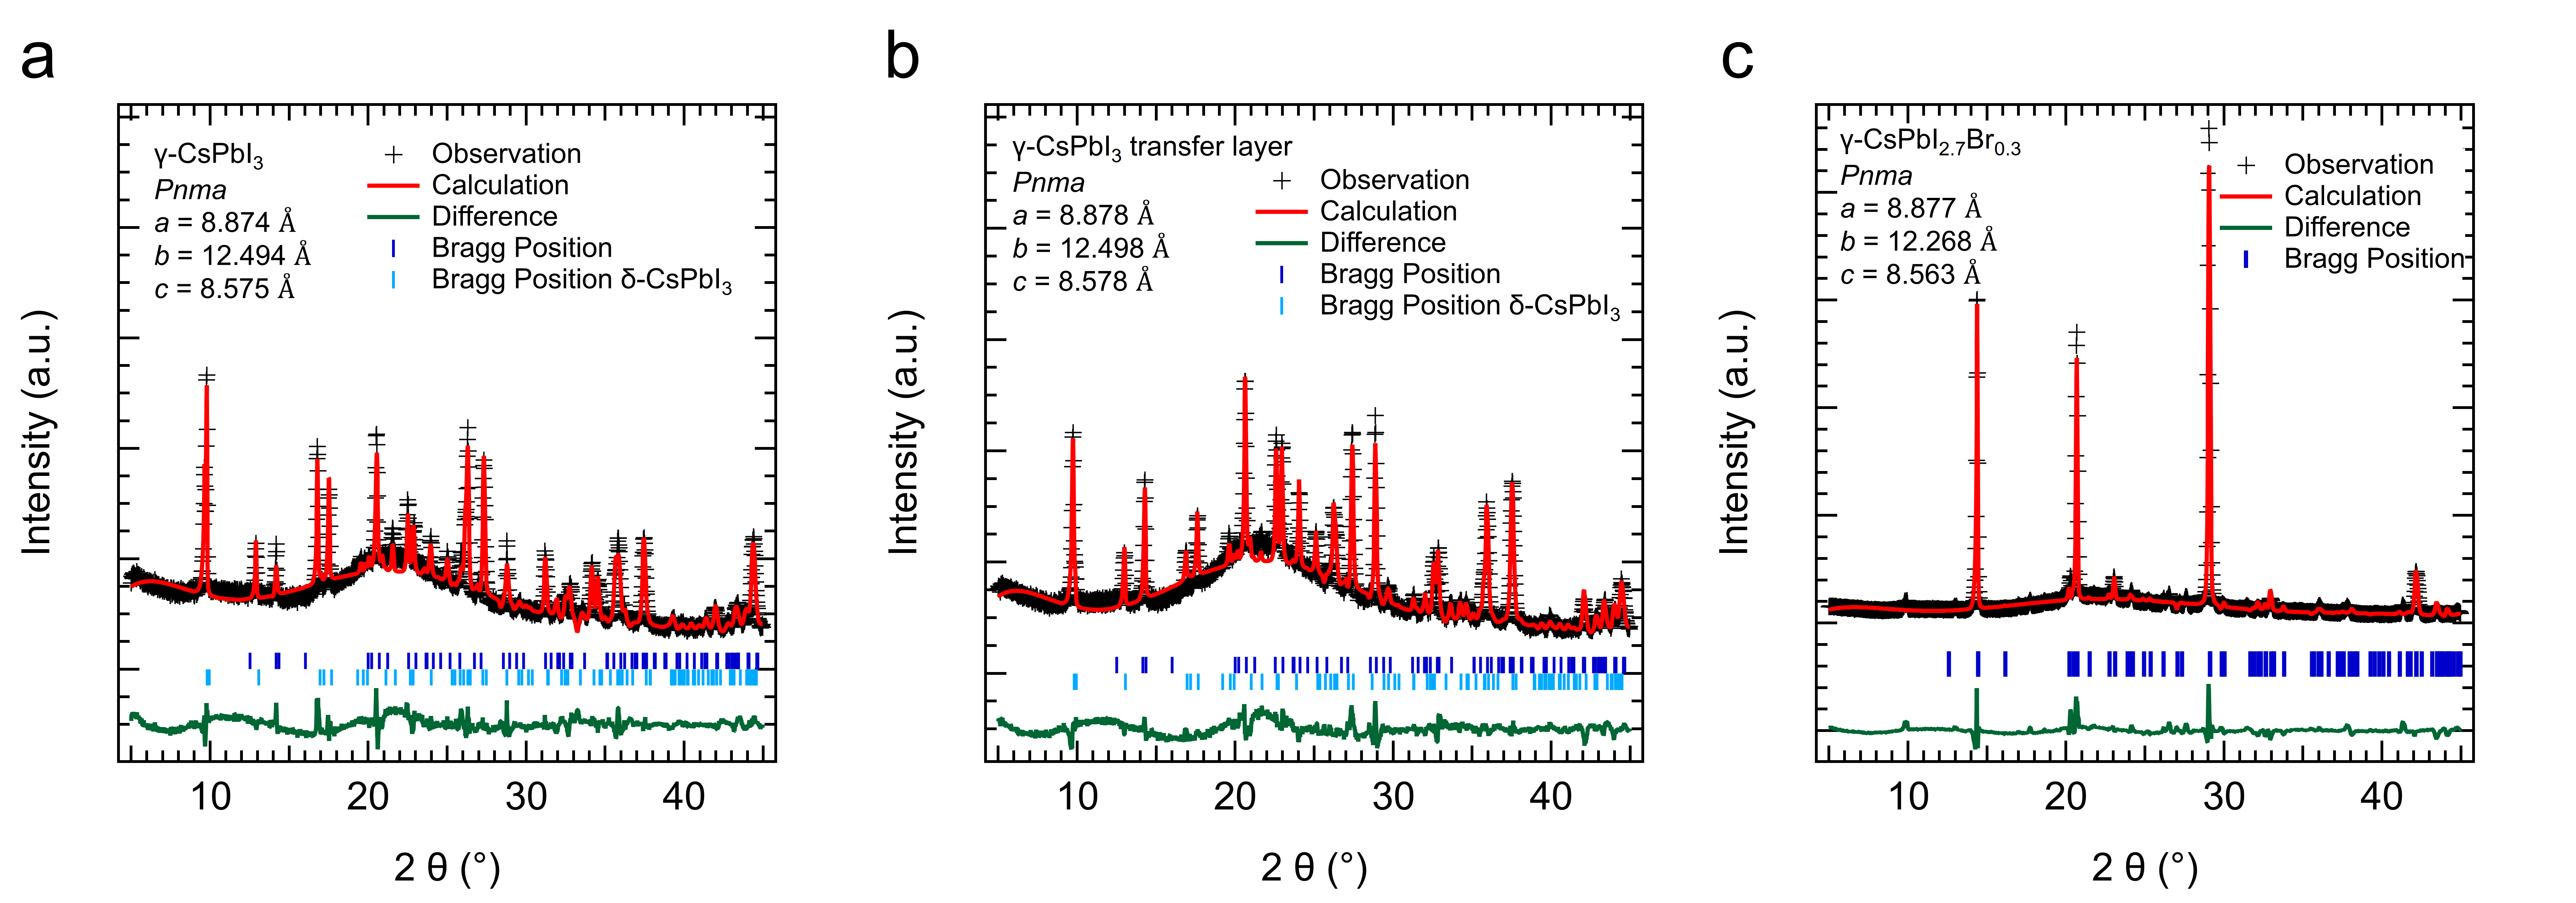


**Supplementary Figure 9 | Rietveld refinement results of XRD patterns of three CsPbI3-basedthin films. a**-**c**,XRD patterns along with theie corresponding Rietveld refinement fitting for CsPbI3 (**a**), CsPbI3 on transport layers (NiOx/Me-4PACz) (**b**), and CsPbI2.7Br0.3 (**c**) thin films on silica glass.The observed profile is marked by black crosses, while the calculated profile is shown by a red line. Bragg peak positions of γ-CsPbI3 and δ-CsPbI3 are labeled by deep blue and light blue symbols, respectively. The difference diffractogram, obtained by substracting calculated profies from experimental data, is shown in green.


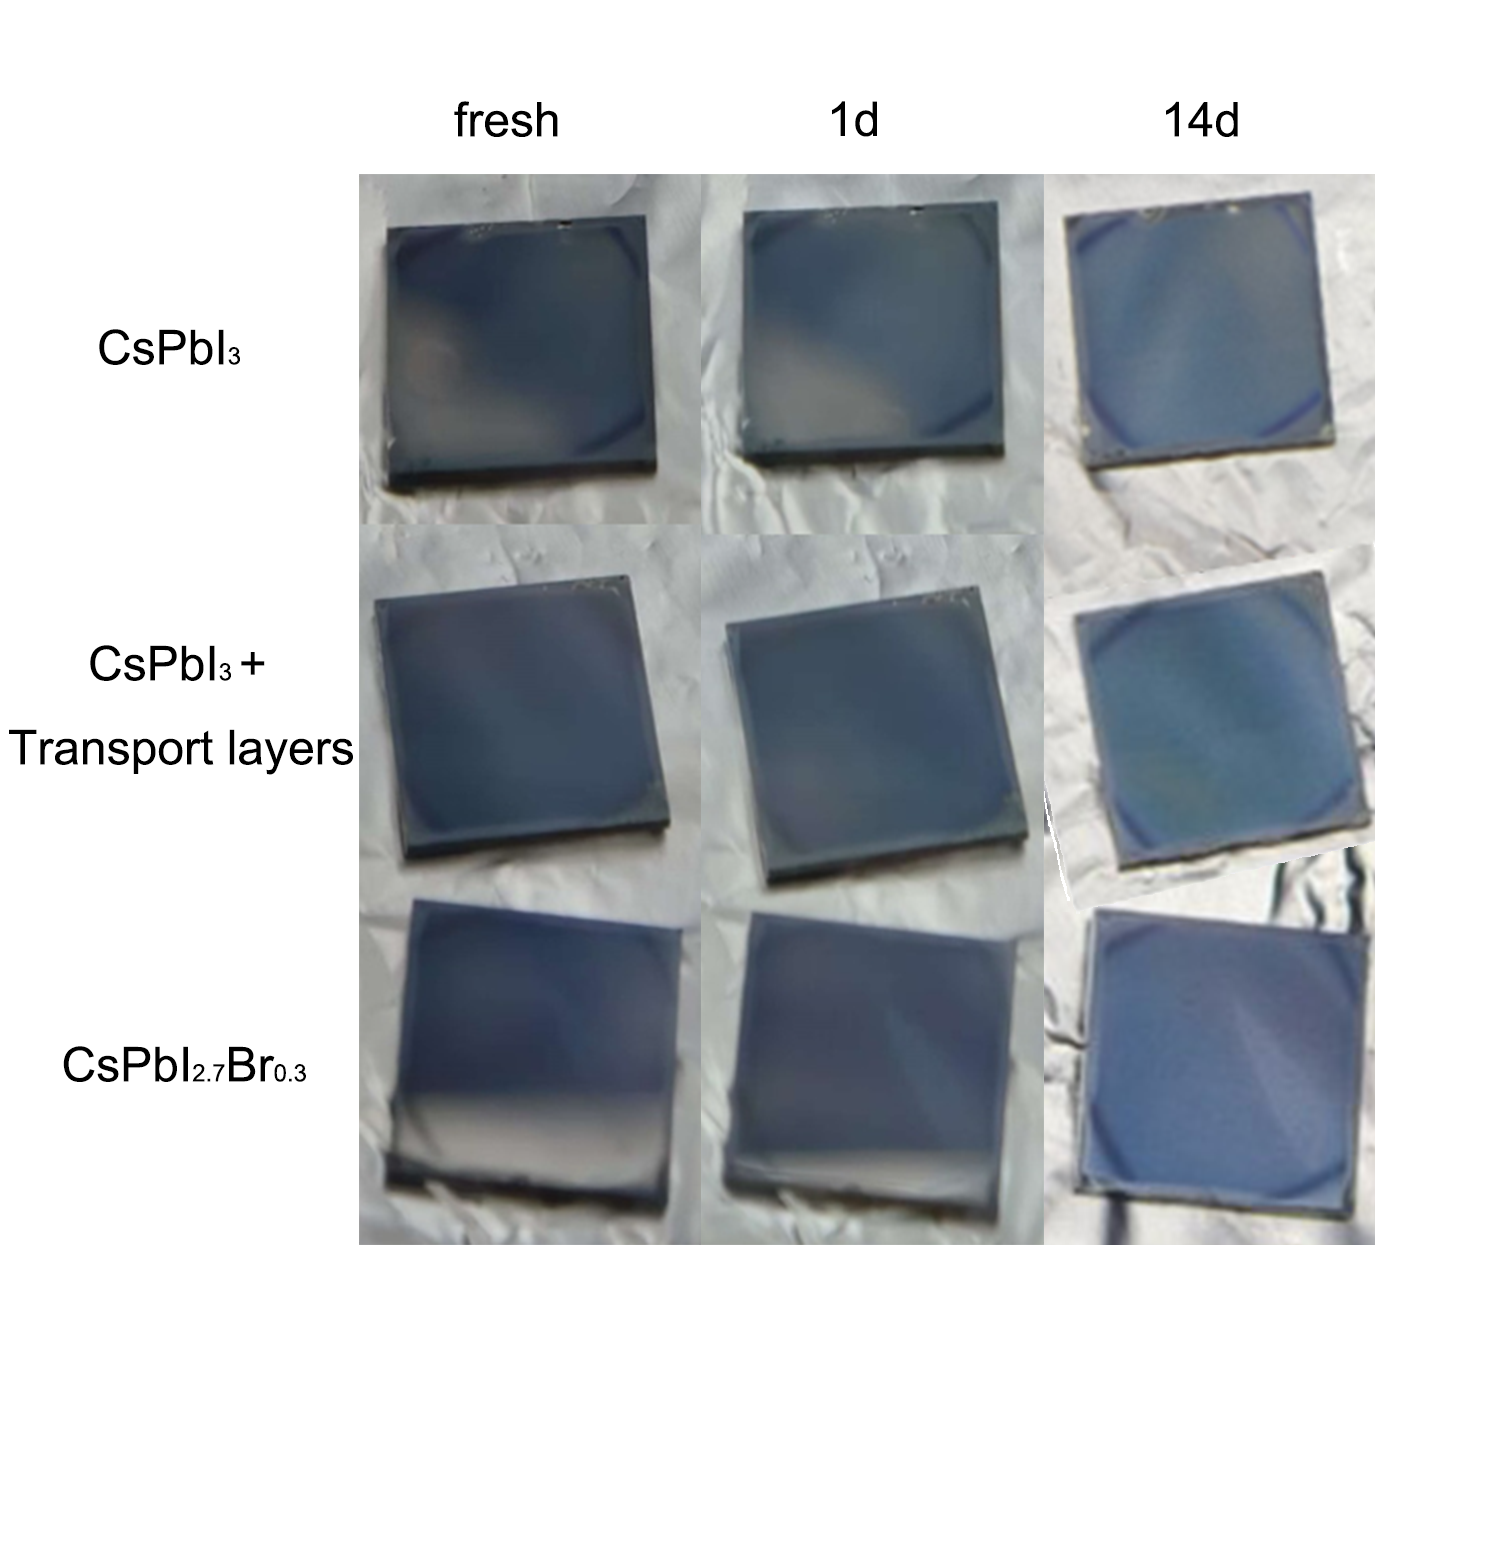


**Supplementary Figure 10 | Black CsPbI3-based thin films, grown on silica glass, transport layers, or incorporating bromines, were stored in a nitrogen-filled glovebox.** CsPbI3 and Br-doped CsPbI2.7Br0.3 thin films on silica glass or transport layers (silica/NiOx/Me-4PACz substrates) were prepared and stored in a nitrogen-filled glovebox. All films maintained their black state for up to 14 days in a nitrogen atmosphere. Photos were taken immediately after preparation (fresh), after 1 day (1d), and after 14 days (14d).


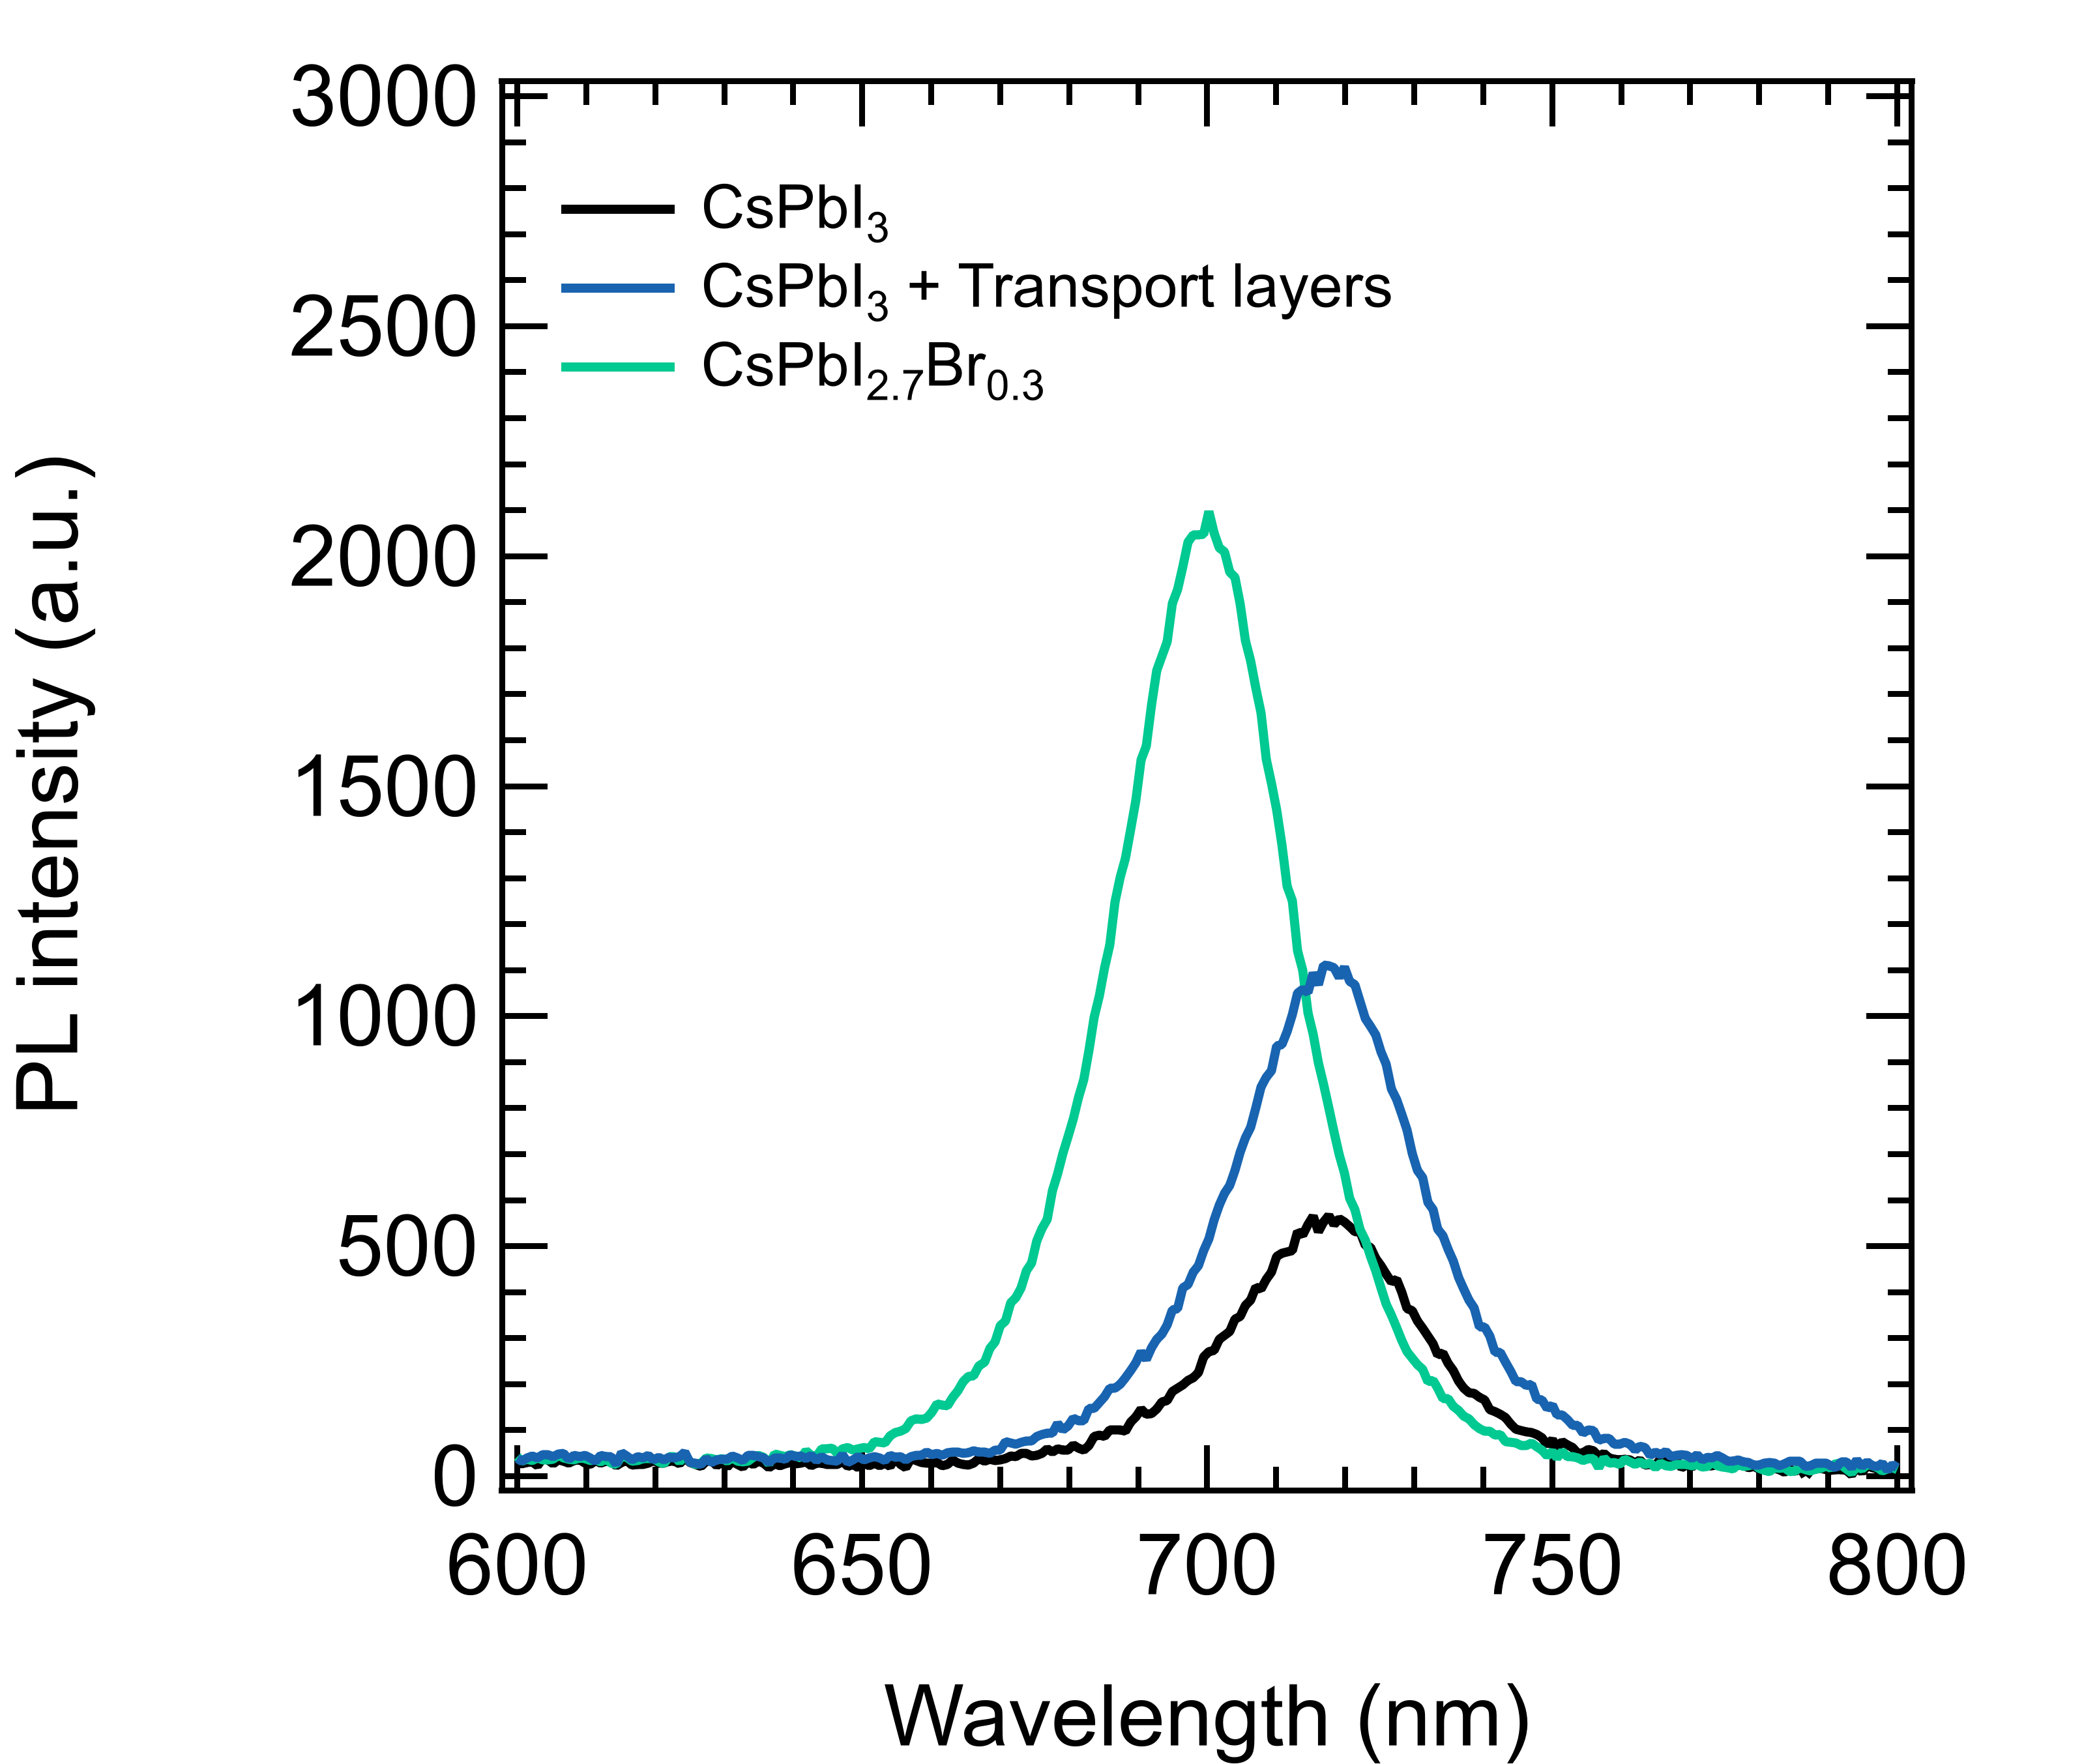


**Supplementary Figure 11 | Photoluminescent (PL) properties of CsPbI3-based thin films.** PL intensities and peak positions of CsPbI3 and CsPbI2.7Br0.3 thin films on silica glass or transport layers (silica/NiOx/Me-4PACz substrates) were collected from thin films prepared for 24 hours and excited uder a 405 nm laser.

**Supplementary** **Table 1 | The enthalpy values at the phase-transitions of a CsPbI3 crystal.**

|  |  | Exothermic | | Endothermic | |
| --- | --- | --- | --- | --- | --- |
| Processes | Phase transitions | Temperature (K) | |△H| (kJ/mol) | Temperature (K) | |△H| (kJ/mol) |
| First heat | δ → α |  |  | ~601 | ~16.6 |
| First cool | α → β | ~545 | ~0.25 |  |  |
| β → γ | ~456 | ~0.20 |  |  |
| Second heat | γ → α | ~456-~500 K | ~16.08 |  |  |
| α → γ |  |  | ~602 | ~16.5 |

**Supplementary** **Table 2 | Relationships between strain components and order parameter components derived from Equation 1 by setting the equilibrium condition , and expressions for strain components in terms of lattice parameters for the settings shown in Figure 3 (following Carpenter et al 2001 Am Mineral 86**[**5**](#_ENREF_5)**, 348–363, McKnight et al 2009 JPCM 21 015901**[**6**](#_ENREF_6)**).**

| *P*4/*mbm* | *Pnma* |
| --- | --- |
|  |  |
|  |  |
|  |  |
|  |  |
|  |  |
|  |  |
|  |  |
|  |  |

**Supplementary** **Table 3 | Lattice parameters and spontaneous strains of black CsPbI3-based films in Supplementary Figure 9,** **and the strains are calculated using the equations from Supplementary Table 2.**

| Lattice parameters and strains | CsPbI3 | CsPbI3 with transport layers | CsPbI2.7Br0.3 |
| --- | --- | --- | --- |
| *a* | 8.873606 Å | 8.877571 Å | 8.774514 Å |
| *b* | 12.494306 Å | 12.497684 Å | 12.26754 Å |
| *c* | 8.574962 Å | 8.577571 Å | 8.563174 Å |
| *e*1 | 0.008526494 | 0.008455802 | 0.000481456 |
| *e*2 | 0.012955374 | 0.013063065 | 0.012021245 |
| *e*1-*e*2 | -0.00442888 | -0.004607263 | -0.011539789 |

**Supplementary References**

1 Liu, J., Phillips, A. E., Keen, D. A. & Dove, M. T. Thermal Disorder and Bond Anharmonicity in Cesium Lead Iodide Studied by Neutron Total Scattering and the Reverse Monte Carlo Method. *The Journal of Physical Chemistry C* **123**, 14934-14940 (2019). <https://doi.org/10.1021/acs.jpcc.9b02936>

2 Marronnier, A. *et al.* Anharmonicity and Disorder in the Black Phases of Cesium Lead Iodide Used for Stable Inorganic Perovskite Solar Cells. *ACS Nano* **12**, 3477-3486 (2018). <https://doi.org/10.1021/acsnano.8b00267>

3 Straus, D. B., Guo, S., Abeykoon, A. M. & Cava, R. J. Understanding the Instability of the Halide Perovskite CsPbI3 through Temperature-Dependent Structural Analysis. *Advanced Materials* **32**, 2001069 (2020). <https://doi.org/https://doi.org/10.1002/adma.202001069>

4 Carpenter, M. A. Elastic anomalies accompanying phase transitions in (Ca,Sr)TiO3 perovskites: Part I. Landau theory and a calibration for SrTiO3. *American Mineralogist* **92**, 309-327 (2007). <https://doi.org/10.2138/am.2007.2295>

5 Carpenter, M. A., Becerro, A. I. & Seifert, F. Strain analysis of phase transitions in (Ca,Sr)TiO3 perovskites. *American Mineralogist* **86**, 348-363 (2001). <https://doi.org/10.2138/am-2001-2-319>

6 McKnight, R. E. A., Howard, C. J. & Carpenter, M. A. Elastic anomalies associated with transformation sequences in perovskites: I. Strontium zirconate, SrZrO3. *Journal of Physics: Condensed Matter* **21**, 015901 (2008). <https://doi.org/10.1088/0953-8984/21/1/015901>
